# Supplementary material for: Novel and optimized strategies for inducing fibrosis in vivo: focus on Duchenne Muscular Dystrophy
Source: PubMed Central journal article supplement (PMC4142391; doi:10.1186/2044-5040-4-7), 2014-08-25
Supplement: 2044-5040-4-7-S1.pdf [file 2044-5040-4-7-S1.pdf]

**Supplementary Table 1**

| <b>Method</b>                        | <b>Genotype</b> | <b>Starting age (weeks)</b> | <b>Sampling age (weeks)</b> |
|--------------------------------------|-----------------|-----------------------------|-----------------------------|
| Chronic exercise (1, 2 and 3 months) | mdx             | 20, 16 and 12               | 24 (in all groups)          |
| Cardiotoxin injury (CTX)             | mdx             | 12                          | 14 and 20                   |
| Laceration (LAC)                     | mdx             | 12                          | 14 and 20                   |
| Denervation (DEN)                    | mdx             | 12                          | 14 and 20                   |
| TGF $\beta$ treatment                | mdx             | 12                          | 14 and 20                   |
| CTGF treatment                       | mdx             | 12                          | 14 and 20                   |
| Laceration (LAC)                     | WT              | 12                          | 14 and 16                   |
| Denervation (DEN)                    | WT              | 12                          | 14 and 16                   |
| CTX+ DEN                             | WT              | 12                          | 14 and 16                   |
| CTX + TGF $\beta$ /CTGF              | WT              | 12                          | 14 and 16                   |
| BaCl <sub>2</sub> 6 rounds           | WT              | 12                          | 14 and 19                   |
