# Supplementary material for: Novel and optimized strategies for inducing fibrosis in vivo: focus on Duchenne Muscular Dystrophy
Source: PubMed Central journal article supplement (PMC4142391; doi:10.1186/2044-5040-4-7), 2014-08-25

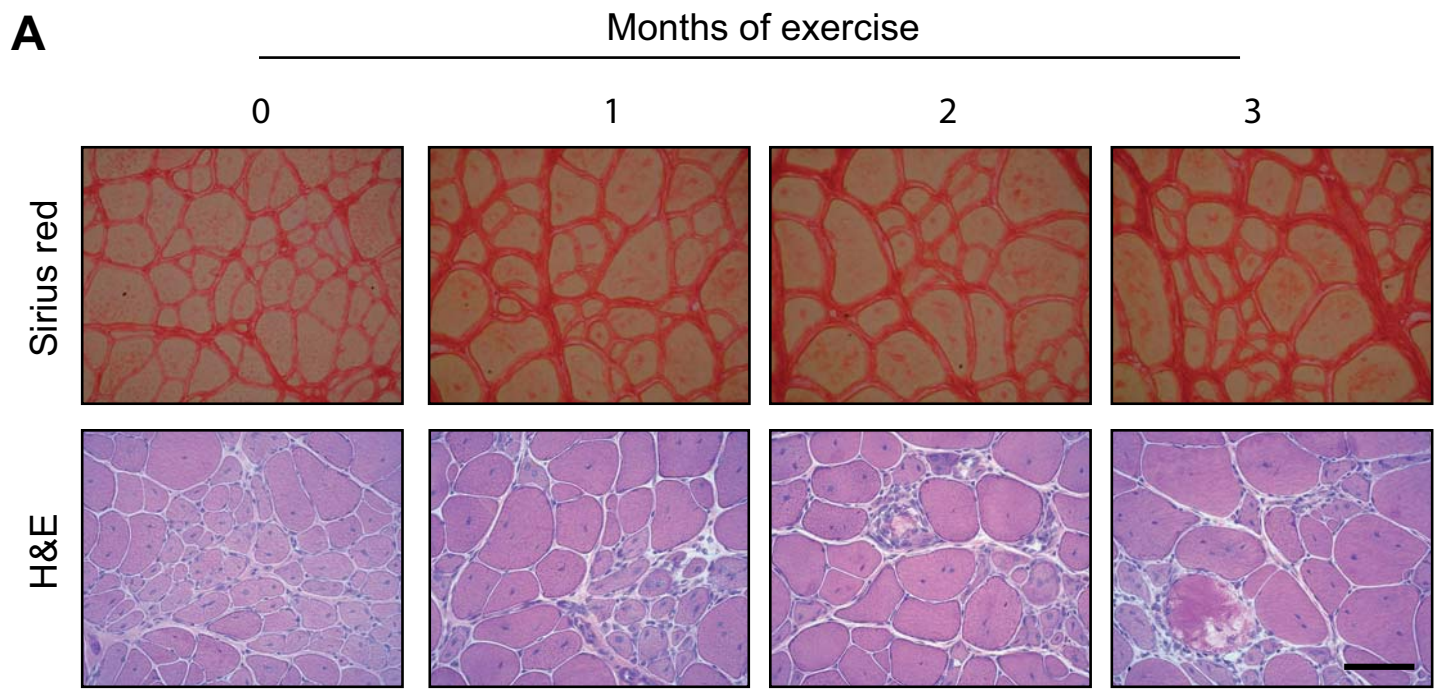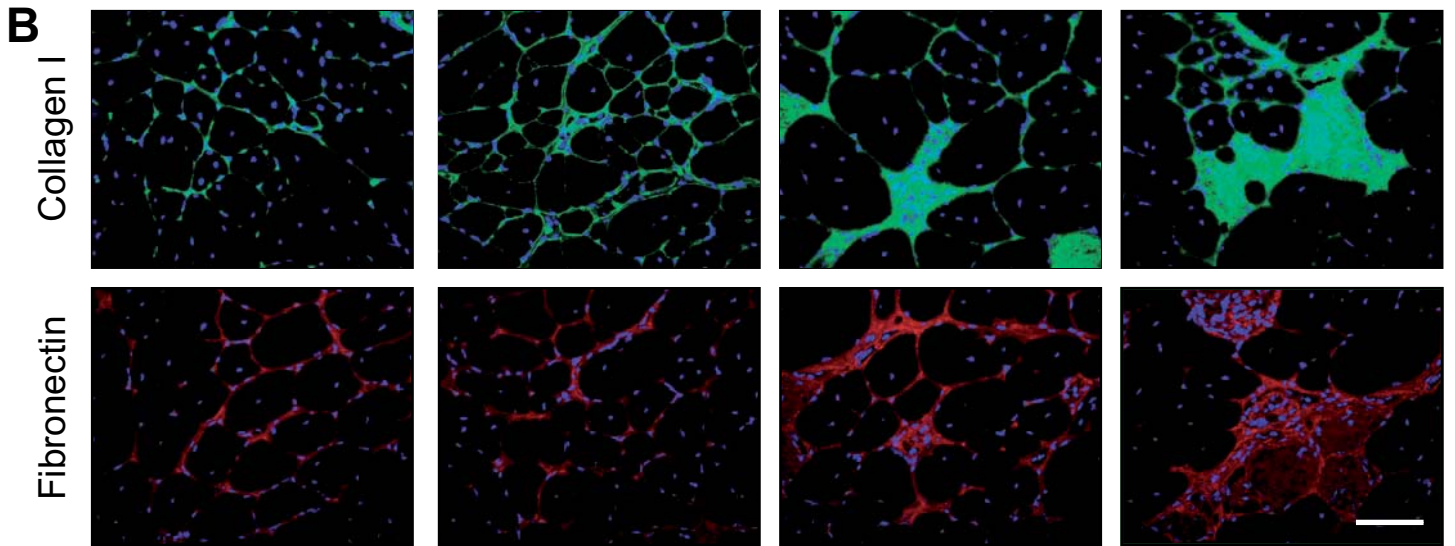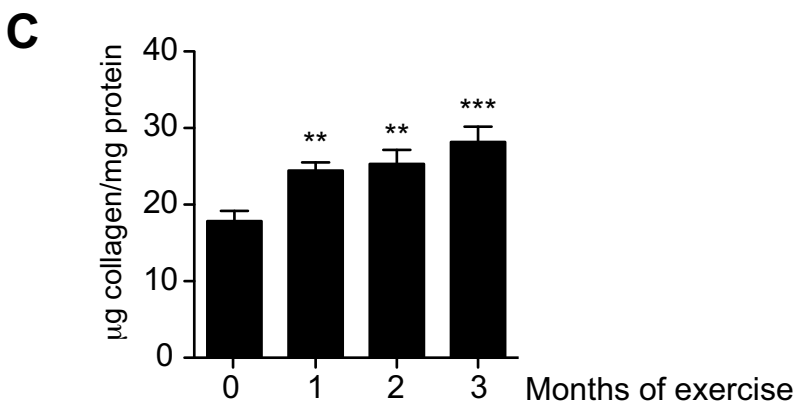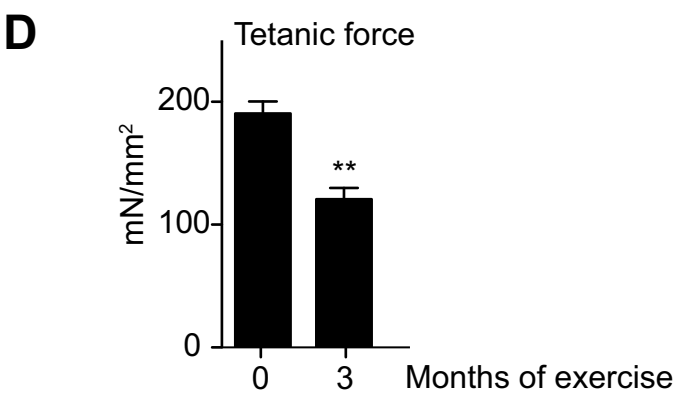

Supplement: 2044-5040-4-7-S3.pdf [file 2044-5040-4-7-S3.pdf]
